# Supplementary material for: A MYOD-SKP2 axis boosts tumorigenesis in fusion negative rhabdomyosarcoma by preventing differentiation through p57Kip2 targeting
Source: Research Square preprint supplement (doi:10.21203/rs.3.rs-2312251/v1), 2022-12-13
Supplement: Supplementary file 1 [file 5abe19e8bcb846fe1ac1da13.pdf]

Reporting Summary

Nature Portfolio wishes to improve the reproducibility of the work that we publish. This form provides structure for consistency and transparency in reporting. For further information on Nature Portfolio policies, see our [Editorial Policies](#) and the [Editorial Policy Checklist](#).

Statistics

For all statistical analyses, confirm that the following items are present in the figure legend, table legend, main text, or Methods section.

|                                     |                                                                                                                                                                                                                                                                                                |
|-------------------------------------|------------------------------------------------------------------------------------------------------------------------------------------------------------------------------------------------------------------------------------------------------------------------------------------------|
| n/a                                 | Confirmed                                                                                                                                                                                                                                                                                      |
| <input type="checkbox"/>            | <input checked="" type="checkbox"/> The exact sample size ( <i>n</i> ) for each experimental group/condition, given as a discrete number and unit of measurement                                                                                                                               |
| <input type="checkbox"/>            | <input checked="" type="checkbox"/> A statement on whether measurements were taken from distinct samples or whether the same sample was measured repeatedly                                                                                                                                    |
| <input type="checkbox"/>            | <input checked="" type="checkbox"/> The statistical test(s) used AND whether they are one- or two-sided<br><i>Only common tests should be described solely by name; describe more complex techniques in the Methods section.</i>                                                               |
| <input type="checkbox"/>            | <input checked="" type="checkbox"/> A description of all covariates tested                                                                                                                                                                                                                     |
| <input type="checkbox"/>            | <input checked="" type="checkbox"/> A description of any assumptions or corrections, such as tests of normality and adjustment for multiple comparisons                                                                                                                                        |
| <input type="checkbox"/>            | <input checked="" type="checkbox"/> A full description of the statistical parameters including central tendency (e.g. means) or other basic estimates (e.g. regression coefficient) AND variation (e.g. standard deviation) or associated estimates of uncertainty (e.g. confidence intervals) |
| <input type="checkbox"/>            | <input checked="" type="checkbox"/> For null hypothesis testing, the test statistic (e.g. <i>F</i> , <i>t</i> , <i>r</i> ) with confidence intervals, effect sizes, degrees of freedom and <i>P</i> value noted<br><i>Give P values as exact values whenever suitable.</i>                     |
| <input checked="" type="checkbox"/> | <input type="checkbox"/> For Bayesian analysis, information on the choice of priors and Markov chain Monte Carlo settings                                                                                                                                                                      |
| <input checked="" type="checkbox"/> | <input type="checkbox"/> For hierarchical and complex designs, identification of the appropriate level for tests and full reporting of outcomes                                                                                                                                                |
| <input type="checkbox"/>            | <input checked="" type="checkbox"/> Estimates of effect sizes (e.g. Cohen's <i>d</i> , Pearson's <i>r</i> ), indicating how they were calculated                                                                                                                                               |

Our web collection on [statistics for biologists](#) contains articles on many of the points above.

Software and code

Policy information about [availability of computer code](#)

|                 |                                                                                                                                                                                                                                                                                                                                                                                                                                                                                                                                                                                                                                                                                                                                                                                                                                                                                                                                                                                                                                                                                                                                                                                          |
|-----------------|------------------------------------------------------------------------------------------------------------------------------------------------------------------------------------------------------------------------------------------------------------------------------------------------------------------------------------------------------------------------------------------------------------------------------------------------------------------------------------------------------------------------------------------------------------------------------------------------------------------------------------------------------------------------------------------------------------------------------------------------------------------------------------------------------------------------------------------------------------------------------------------------------------------------------------------------------------------------------------------------------------------------------------------------------------------------------------------------------------------------------------------------------------------------------------------|
| Data collection | Image acquisition for the determination of GI50 by Celigo Imaging Cytometer (Nexcelom Bioscience, Lawrence, MA, USA); the measurement of Caspase-3/7 activity by EnSpire Multimode Plate Reader (PerkinElmer, Waltham, MA, USA); the mRNA expression levels by Applied Biosystems 7900HT Fast RealTime PCR System (Applied Biosystems, Waltham, MA, USA); light microscopy imaging was performed by Olympus Digital Camera XC50 (Olympus Corporation, Shinjuku-ku, Tokyo, Japan); flow cytometry experiments were performed on FACS Cantoll equipped with a FACSDiva 6.1 CellQuestTM software (Becton Dickinson Instrument, San Jos , CA, USA); B-galactosidase staining assay images were acquired with Leica DMI8 microscope (Leica microsystems, Mannheim, Germany); fluorescence images were acquired with Leica DMI8 microscope (Leica microsystems, Mannheim, Germany); Proximity Ligation Assay images were acquired by Olympus FV3000 confocal microscopy with Olympus FV315S-SW image 26 acquisition software; the light microscopy immunohistochemistry imaging was performed on a Nikon 28 E600 light microscope equipped with NIS Elements BR software, using 20x objective. |
| Data analysis   | Poly-A selected RNA libraries were prepared and sequenced on an Illumina HiSeq2000. Reads were aligned to hg38 using STAR version 2.6.0a, and gene expression was calculated as Fragments Per Kilobase of transcript per Million mapped reads (FPKM) and Transcripts per Million (TPM) using edgeR v3.7. GO enrichment output was created using GSEA running filtered up-regulated gene lists (> 1.5 log2 fold change). z score normalization has been performed to visualize differentially expressed genes as heatmap. ChIP-seq enrichment peaks of public datasets were visualized with IGV. AQuA HiChIP data of public dataset was visualized in Juicebox. Software used for statistical tests include Graphpad Prism(8.4.3) and Microsoft Excel (16.0.10392). Other used softwares were ImageJ(2.0.0), Adobe Photoshop (2022), Adobe Illustrator (2022).                                                                                                                                                                                                                                                                                                                            |

For manuscripts utilizing custom algorithms or software that are central to the research but not yet described in published literature, software must be made available to editors and reviewers. We strongly encourage code deposition in a community repository (e.g. GitHub). See the Nature Portfolio [guidelines for submitting code & software](#) for further information.

## Data

Policy information about [availability of data](#)

All manuscripts must include a [data availability statement](#). This statement should provide the following information, where applicable:

- Accession codes, unique identifiers, or web links for publicly available datasets
- A description of any restrictions on data availability
- For clinical datasets or third party data, please ensure that the statement adheres to our [policy](#)

Previously published GEO datasets used in the study were: Affymetrix profiling data (GSE66533, GSE14333, GSE108474, GSE111678, GSE14827, GSE16011, GSE26673, GSE31684, GSE32676, GSE32701, GSE34620, GSE39671, GSE42743, GSE43580, GSE64019, GSE64415, GSE7553, GSE7696, GSE87371, GSE9843, GSE2658, GSE16476, GSE9891, GSE9103, GSE2109, GSE7307 and (Northcott PA. et al., Nature 2017).

ChIP-seq data (GSE83728, GSE137168, GSE29611).

RNA-seq data (GSE52529).

AQuA HiChIP data (GSE120770).

The remaining data are available within the article, supplementary Information or available from the authors upon request.

## Human research participants

Policy information about [studies involving human research participants and Sex and Gender in Research](#).

|                             |                                                                                                                                                                                                                                                                                                                                                                                                                                                                                                                                                                                                                                                                                                      |
|-----------------------------|------------------------------------------------------------------------------------------------------------------------------------------------------------------------------------------------------------------------------------------------------------------------------------------------------------------------------------------------------------------------------------------------------------------------------------------------------------------------------------------------------------------------------------------------------------------------------------------------------------------------------------------------------------------------------------------------------|
| Reporting on sex and gender | No sex or gender information associated with the tissue samples were requested because the study was only aimed at evaluating the expression of the SKP2 protein in primary tissues sections.                                                                                                                                                                                                                                                                                                                                                                                                                                                                                                        |
| Population characteristics  | Formalin-fixed paraffin embedded (FFPE) tissue blocks from cases of fusion negative or fusion positive rhabdomyosarcoma were obtained at the diagnosis in patients aged from 1 to 19 years from department archives per Institutional Review Board approval. Biopsy of adjacent normal muscle tissues were done when ethically possible. All tissue sections were de-identified prior to their use in immunohistochemical stains for the manuscript. No clinical information associated with the tissue samples was requested because the study was only aimed at evaluating the expression of the SKP2 protein in primary tissues sections and, thus, no clinical correlations were needed or done. |
| Recruitment                 | All FFPE tissue samples were obtained retrospectively. No patients were recruited for this study.                                                                                                                                                                                                                                                                                                                                                                                                                                                                                                                                                                                                    |
| Ethics oversight            | Sections of FFPE human samples were obtained from the Pathology Unit of Bambino Gesù Children's Hospital (Rome, Italy) and the approval of the study was obtained from the Institutional Ethical Committee of the Research Center (Authorization 120 LB, 02/10/2015).                                                                                                                                                                                                                                                                                                                                                                                                                                |

Note that full information on the approval of the study protocol must also be provided in the manuscript.

## Field-specific reporting

Please select the one below that is the best fit for your research. If you are not sure, read the appropriate sections before making your selection.

☒ Life sciences ☐ Behavioural & social sciences ☐ Ecological, evolutionary & environmental sciences

For a reference copy of the document with all sections, see [nature.com/documents/nr-reporting-summary-flat.pdf](https://www.nature.com/documents/nr-reporting-summary-flat.pdf)

## Life sciences study design

All studies must disclose on these points even when the disclosure is negative.

|                 |                                                                                                                                                                                                                                                                                                                                                                                                                        |
|-----------------|------------------------------------------------------------------------------------------------------------------------------------------------------------------------------------------------------------------------------------------------------------------------------------------------------------------------------------------------------------------------------------------------------------------------|
| Sample size     | In vivo studies were designed to obtain statistically significant results while maintaining minimum animal sacrifice according to 3Rs principle (Arfin & Zahiruddin 2017). No sample-size calculation was performed for the in vitro experiments. Each condition was analyzed with three biological replicates, a standard for the experiments performed to account for reasonable range of variability among samples. |
| Data exclusions | No data was excluded from the study.                                                                                                                                                                                                                                                                                                                                                                                   |
| Replication     | Experiments were repeated in three biological replicates unless stated otherwise.                                                                                                                                                                                                                                                                                                                                      |
| Randomization   | Cell lines and mice used in the study were isogenic and maintained at minimally perturbative conditions so randomization is not relevant to the study.                                                                                                                                                                                                                                                                 |
| Blinding        | Blinding approach was not possible as the tumor phenotype was visually prominent in the shSKP2 knock down injected tumors and in the MLN4924 treated tumors. For cell line experiments blinding was either not necessary as the collection and analysis were performed by software/equipment uniformly post treatment and not possible in cases where the phenotype was prominent during data collection.              |

# Reporting for specific materials, systems and methods

We require information from authors about some types of materials, experimental systems and methods used in many studies. Here, indicate whether each material, system or method listed is relevant to your study. If you are not sure if a list item applies to your research, read the appropriate section before selecting a response.

## Materials & experimental systems

| n/a                                 | Involved in the study                                           |
|-------------------------------------|-----------------------------------------------------------------|
| <input type="checkbox"/>            | <input checked="" type="checkbox"/> Antibodies                  |
| <input type="checkbox"/>            | <input checked="" type="checkbox"/> Eukaryotic cell lines       |
| <input checked="" type="checkbox"/> | <input type="checkbox"/> Palaeontology and archaeology          |
| <input type="checkbox"/>            | <input checked="" type="checkbox"/> Animals and other organisms |
| <input checked="" type="checkbox"/> | <input type="checkbox"/> Clinical data                          |
| <input checked="" type="checkbox"/> | <input type="checkbox"/> Dual use research of concern           |

## Methods

| n/a                                 | Involved in the study                              |
|-------------------------------------|----------------------------------------------------|
| <input checked="" type="checkbox"/> | <input type="checkbox"/> ChIP-seq                  |
| <input type="checkbox"/>            | <input checked="" type="checkbox"/> Flow cytometry |
| <input checked="" type="checkbox"/> | <input type="checkbox"/> MRI-based neuroimaging    |

## Antibodies

### Antibodies used

SKP2 (H-435) Santa Cruz Biotechnology Cat# sc-7164, RRID:AB\_2187650  
 MyoD (M-318) Santa Cruz Biotechnology Cat# sc-760, RRID:AB\_2148870  
 pMYOD (Ser-200) Santa Cruz Biotechnology Cat# sc-101741, RRID:AB\_2148764  
 p27 Kip1 (C-19) Santa Cruz Biotechnology Cat# sc-1641, RRID:AB\_628074  
 Myosin Heavy Chain DSHB Cat# MF 20, RRID:AB\_2147781  
 p21 Waf1/Cip1 (12D1) Cell Signaling Technology Cat# 2947, RRID:AB\_823586  
 Nedd8 19E3 Cell Signaling Technology Cat# 2754, RRID:AB\_659972  
 MYOG DSHB Cat# F5D, RRID:AB\_2146602  
 p57 Kip2 BD Biosciences Cat# 556346, RRID:AB\_396375  
 GAPDH (B16H11) Cell Signaling Technology Cat# 5174, RRID:AB\_10622025  
 β-ACTIN (I-19) Santa Cruz Biotechnology Cat# sc-1616, RRID:AB\_630836  
 αTubulin (DM1A) Novus Biologicals Cat# NB100-92249, RRID:AB\_1218281  
 Vinculin (hVIN-1) Sigma Cat# V9131, RRID:AB\_477629  
 HRP (Horseradish peroxidase) anti-rabbit Cell Signaling Technology Cat# 7074, RRID:AB\_2099233  
 HRP anti-mouse Cell Signaling Technology Cat# 7076, RRID:AB\_330924  
 SKP2 Thermofisher Scientific Cat# 32-3300, RRID:AB\_2533074  
 p27 Kip1 (SX53G8.5) Santa Cruz Biotechnology Cat# sc-53871, RRID:AB\_785029  
 p57 Kip2 (KP39) Santa Cruz Biotechnology Cat# sc-56341, RRID:AB\_785045  
 Cleaved Caspase 3 Cell Signaling Technology Cat# 9661, RRID:AB\_2341188

### Validation

All antibodies were validated in RMS cell line samples by cross comparing to vendor provided molecular size information using western blotting. SKP2 antibody was validated by western blotting in SKP2 knock down in RD, JR1, RD18 and RH36 cells and by immunostaining in negative control muscle tissue.

## Eukaryotic cell lines

Policy information about [cell lines and Sex and Gender in Research](#)

### Cell line source(s)

RD and RH30 were obtained from ATCC (Rockville, MD, USA), RD18 cells were a gift of C. Ponzetto (Department of Oncology, University of Turin, Turin, Italy). RH2, JR1, RH36 and RH4 cells were provided by P. Houghton. HSMM were purchased from Lonza (Walkersville, MD, USA). C2C12 and C3H/10T1/2 were purchased from ATCC (Rockville, MD, USA). Orthotopic patient-derived xenograft (o-PDX) cells SJRHB011\_YC, SJRHB012\_YC and SJRHB012\_ZC were obtained through the Childhood Solid Tumor Network (CSTN) at St. Jude Children's Hospital (Memphis, TN, USA).

### Authentication

The cell lines used were authenticated by STR profiling.

### Mycoplasma contamination

Cell lines are tested for mycoplasma contamination by PCR every month. All lines to date tested negative.

### Commonly misidentified lines (See [ICLAC](#) register)

No commonly misidentified cell lines were used in this study.

## Animals and other research organisms

Policy information about [studies involving animals](#); [ARRIVE guidelines](#) recommended for reporting animal research, and [Sex and Gender in Research](#)

### Laboratory animals

NSG female mice aged 6–8 weeks were used for xenografts experiments. Animals were maintained in sterile conditions, 12h light/12h dark cycle, ambient temperature 18–23°C with 40–60% humidity.

|                         |                                                                                                                                                                                                                                                                                                                                                                                                                                                                                                                                                                                                                                       |
|-------------------------|---------------------------------------------------------------------------------------------------------------------------------------------------------------------------------------------------------------------------------------------------------------------------------------------------------------------------------------------------------------------------------------------------------------------------------------------------------------------------------------------------------------------------------------------------------------------------------------------------------------------------------------|
| Wild animals            | Study did not involve wild animals.                                                                                                                                                                                                                                                                                                                                                                                                                                                                                                                                                                                                   |
| Reporting on sex        | The xenograft studies involved female mice as in our previous published work (Pomella S et al., Nature Communication 2021). Female mice allow the housing of maximum five mice per cage.                                                                                                                                                                                                                                                                                                                                                                                                                                              |
| Field-collected samples | Study did not involve field collected samples.                                                                                                                                                                                                                                                                                                                                                                                                                                                                                                                                                                                        |
| Ethics oversight        | All animal experiments were performed in accordance with the Guidelines for Animal Care and Use of the National Institutes of Health and approved by the Institutional Animal Care and Use Committee (IACUC) at the University of Texas Health Science Center, San Antonio, Texas (protocol number 20150015AR) and in accordance with the European Communities Council Directive N. 2010/63/EU, the Italian Ministry of Health guidelines (DL 26/2014) and approved by the Italian Ministry of Health for the Children's Hospital Bambino Gesù/Plaisant animal facility of Castel Romano in Rome, Italy (protocol number 88/2016-PR). |

Note that full information on the approval of the study protocol must also be provided in the manuscript.

## Flow Cytometry

### Plots

Confirm that:

- ☒ The axis labels state the marker and fluorochrome used (e.g. CD4-FITC).
- ☒ The axis scales are clearly visible. Include numbers along axes only for bottom left plot of group (a 'group' is an analysis of identical markers).
- ☐ All plots are contour plots with outliers or pseudocolor plots.
- ☒ A numerical value for number of cells or percentage (with statistics) is provided.

### Methodology

|                           |                                                                                                                                                                                                                                                                                                                                                                                                                                                                                                                              |
|---------------------------|------------------------------------------------------------------------------------------------------------------------------------------------------------------------------------------------------------------------------------------------------------------------------------------------------------------------------------------------------------------------------------------------------------------------------------------------------------------------------------------------------------------------------|
| Sample preparation        | RD, JR1, RD18 and RH36 human fusion negative rhabdomyosarcoma cells were harvested by trypsinization, washed in cold phosphate buffered saline (PBS), fixed in cold 50% PBS and 50% acetone/methanol (1:4 v/v) for at least 1h. Fixed cells were pelleted 5 minutes 1500 rpm and alcoholic fixative removed. Pellet was stained in the dark with a solution of 50 µg/ml propidium iodide (PI) (ThermoFisher Scientific, Rockford, USA) and 50 µg/ml RNase (Sigma-Aldrich, St Louis, MO, USA) for 30 min at room temperature. |
| Instrument                | BD FACS Cantoll (Becton Dickinson Instrument, San José, CA, USA).                                                                                                                                                                                                                                                                                                                                                                                                                                                            |
| Software                  | BD FACSDiva 6.1 CellQuest™ software (Becton Dickinson Instrument, San José, CA, USA).                                                                                                                                                                                                                                                                                                                                                                                                                                        |
| Cell population abundance | 10.000 events were analyzed for each experimental condition. No sorting experiments were performed.                                                                                                                                                                                                                                                                                                                                                                                                                          |
| Gating strategy           | All the acquired events were gated, based on SSC and FSC, to analyze only the singlets population to avoid possible bias due to doublets.                                                                                                                                                                                                                                                                                                                                                                                    |

- ☐ Tick this box to confirm that a figure exemplifying the gating strategy is provided in the Supplementary Information.
